# Supplementary material for: Lymphaticovenous Anastomosis for Age-Related Lymphedema
Source: MDPI journal article supplement (doi:10.3390/jcm10215129), 2021-10-31
Supplement: s1 [file jcm-1422532-supplementary.pdf › jcm-1422532-supplementary.pdf]

## Supplementary Materials

**Table S1.** The number of cases excluded from the study.

|                                                        | <b>&lt;35 Group</b> | <b>35–64 Group</b> | <b>≥65 Group</b> | <b>Sum Number</b> |
|--------------------------------------------------------|---------------------|--------------------|------------------|-------------------|
| Initial number for screen                              | 20                  | 204                | 266              | <b>490</b>        |
| Number of cases excluded from the study                |                     |                    |                  |                   |
| Need for support                                       | 0                   | 5                  | 43               | <b>48</b>         |
| Body mass index (BMI) ≥35                              | 0                   | 15                 | 7                | <b>22</b>         |
| History of a major invasive procedure to pelvic cancer | 2                   | 132                | 96               | <b>230</b>        |
| Radiation therapy to the lower limbs or abdomen        | 0                   | 2                  | 3                | <b>5</b>          |
| Heart failure                                          | 0                   | 0                  | 2                | <b>2</b>          |
| Renal failure                                          | 0                   | 1                  | 1                | <b>2</b>          |
| Cirrhosis of the liver,                                | 0                   | 1                  | 2                | <b>3</b>          |
| Hypoproteinemia                                        | 0                   | 5                  | 7                | <b>12</b>         |
| Deep vein thrombosis                                   | 0                   | 2                  | 8                | <b>10</b>         |
| Chronic venous obstruction or venous reflux            | 0                   | 12                 | 26               | <b>38</b>         |
| Thyroid dermopathy                                     | 0                   | 2                  | 5                | <b>7</b>          |
| Other endocrine cause of edema                         | 0                   | 3                  | 2                | <b>5</b>          |
| Drug-induced edema                                     | 1                   | 5                  | 9                | <b>15</b>         |
| Arterial and/or venous malformation;                   | 1                   | 4                  | 0                | <b>5</b>          |
| Total number of cases excluded from the study          | 4                   | 189                | 211              | <b>404</b>        |
| Total number of cases included into this study         | 16                  | 15                 | 55               | <b>86</b>         |

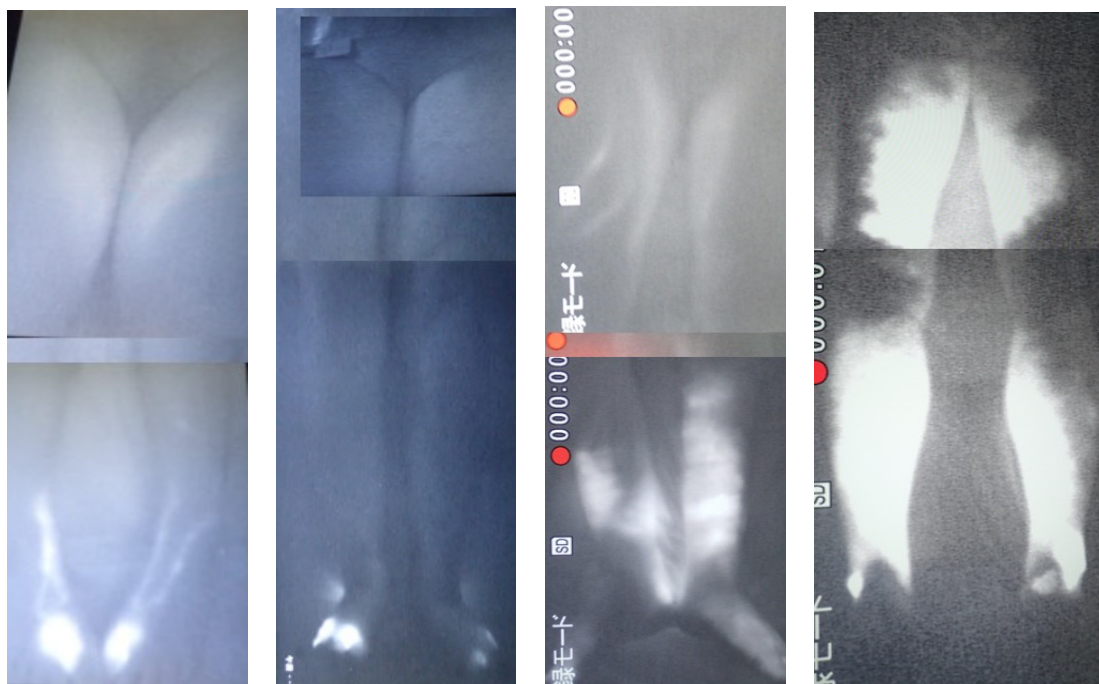

**Figure S1.** Patterns of age-related primary lymphedema in the lower extremities seen on indocyanine green lymphography.

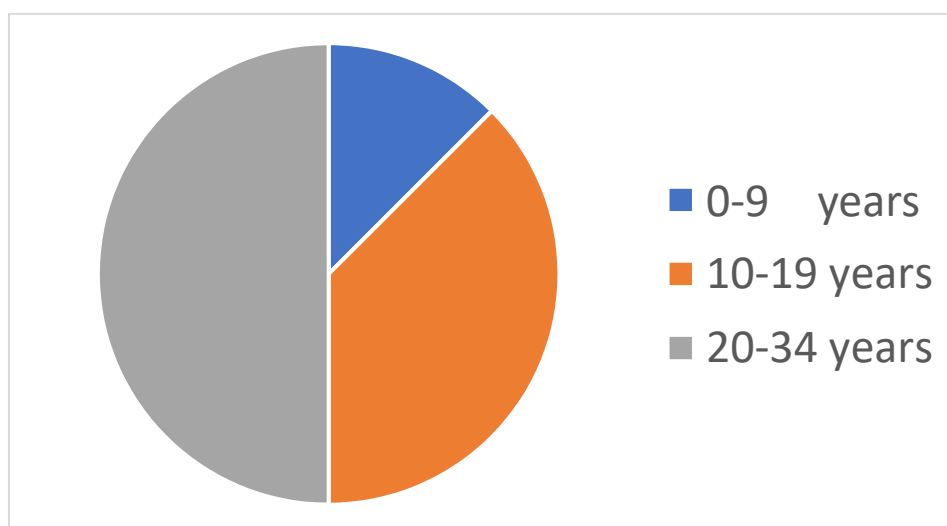

**Figure S2.** Number of cases divided by its onset age in <35 group.

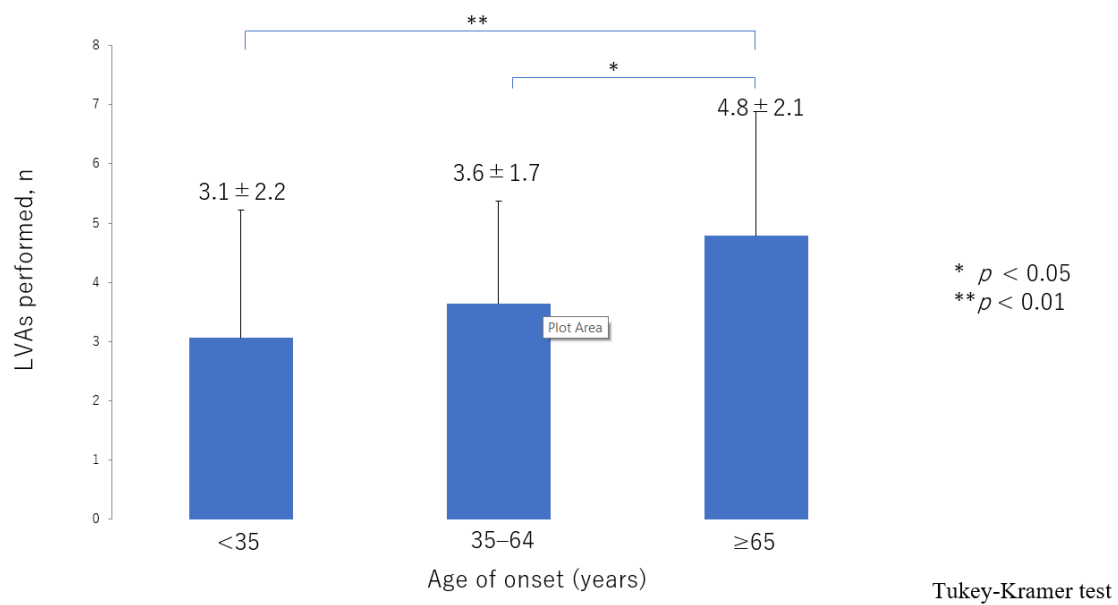

**Figure S3.** Number of performed LVAs according to age of onset.

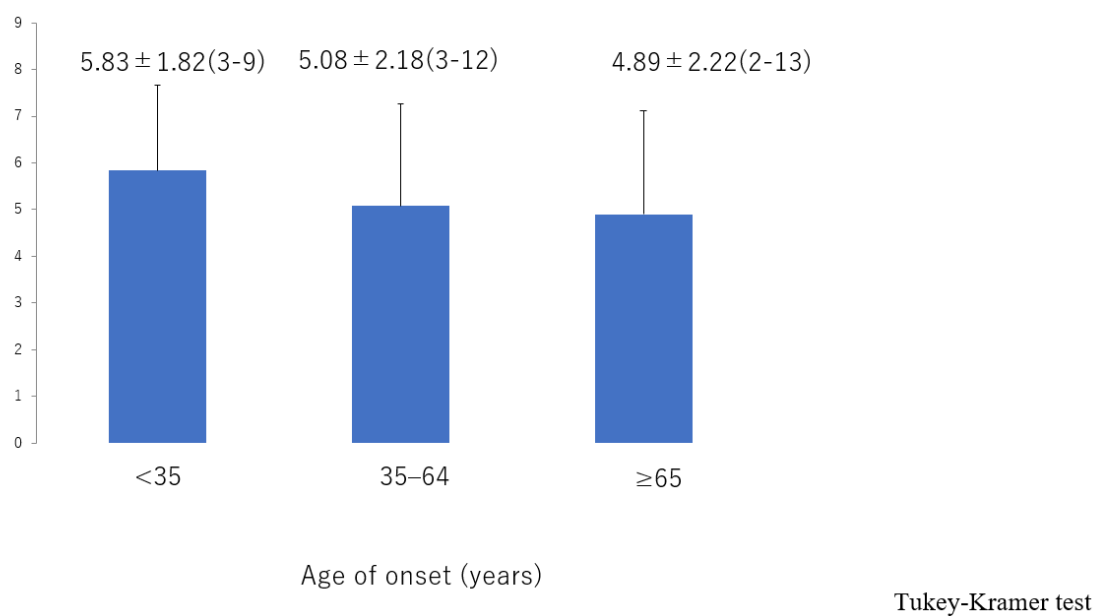

**Figure S4.** Number of skin incisions for LVA.

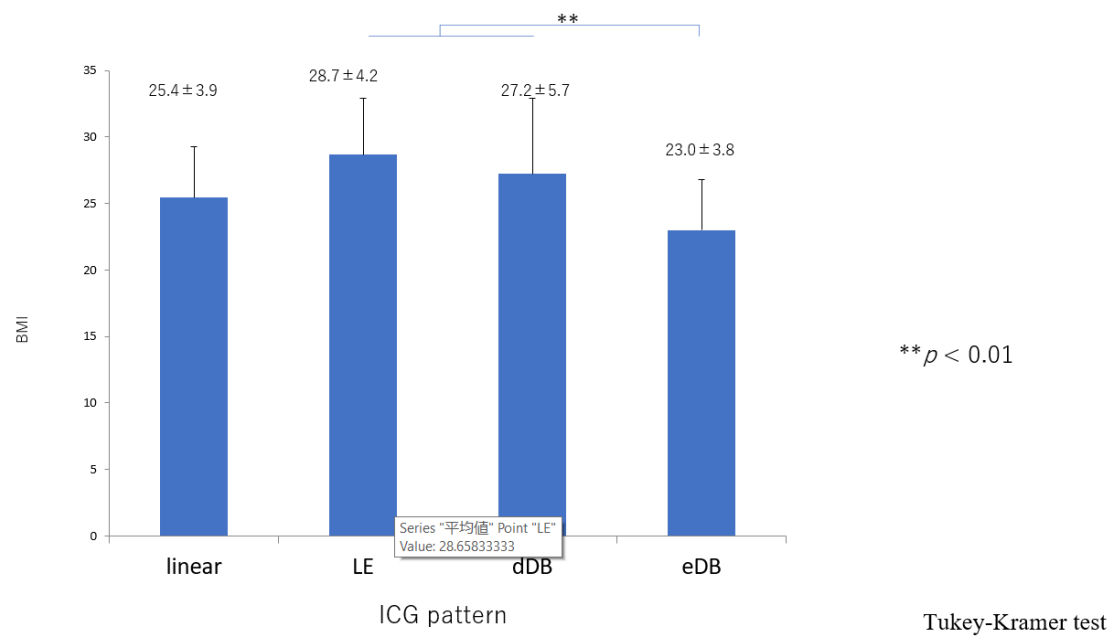

**Figure S5.** ICG pattern according to BMI independent of age.
